# Supplementary material for: ADCC-activating antibodies correlate with protection against congenital human cytomegalovirus infection
Source: bioRxiv or medRxiv preprint supplement (doi:10.1101/2023.03.15.23287332), 2023-03-17
Supplement: Supplementary file [file media-1.pdf]

**Supplementary Figure 1. Identification of HCMV transmitting and non-transmitting mother-infant dyads from the Carolinas Cord Blood Bank (CCBB) biorepository.**

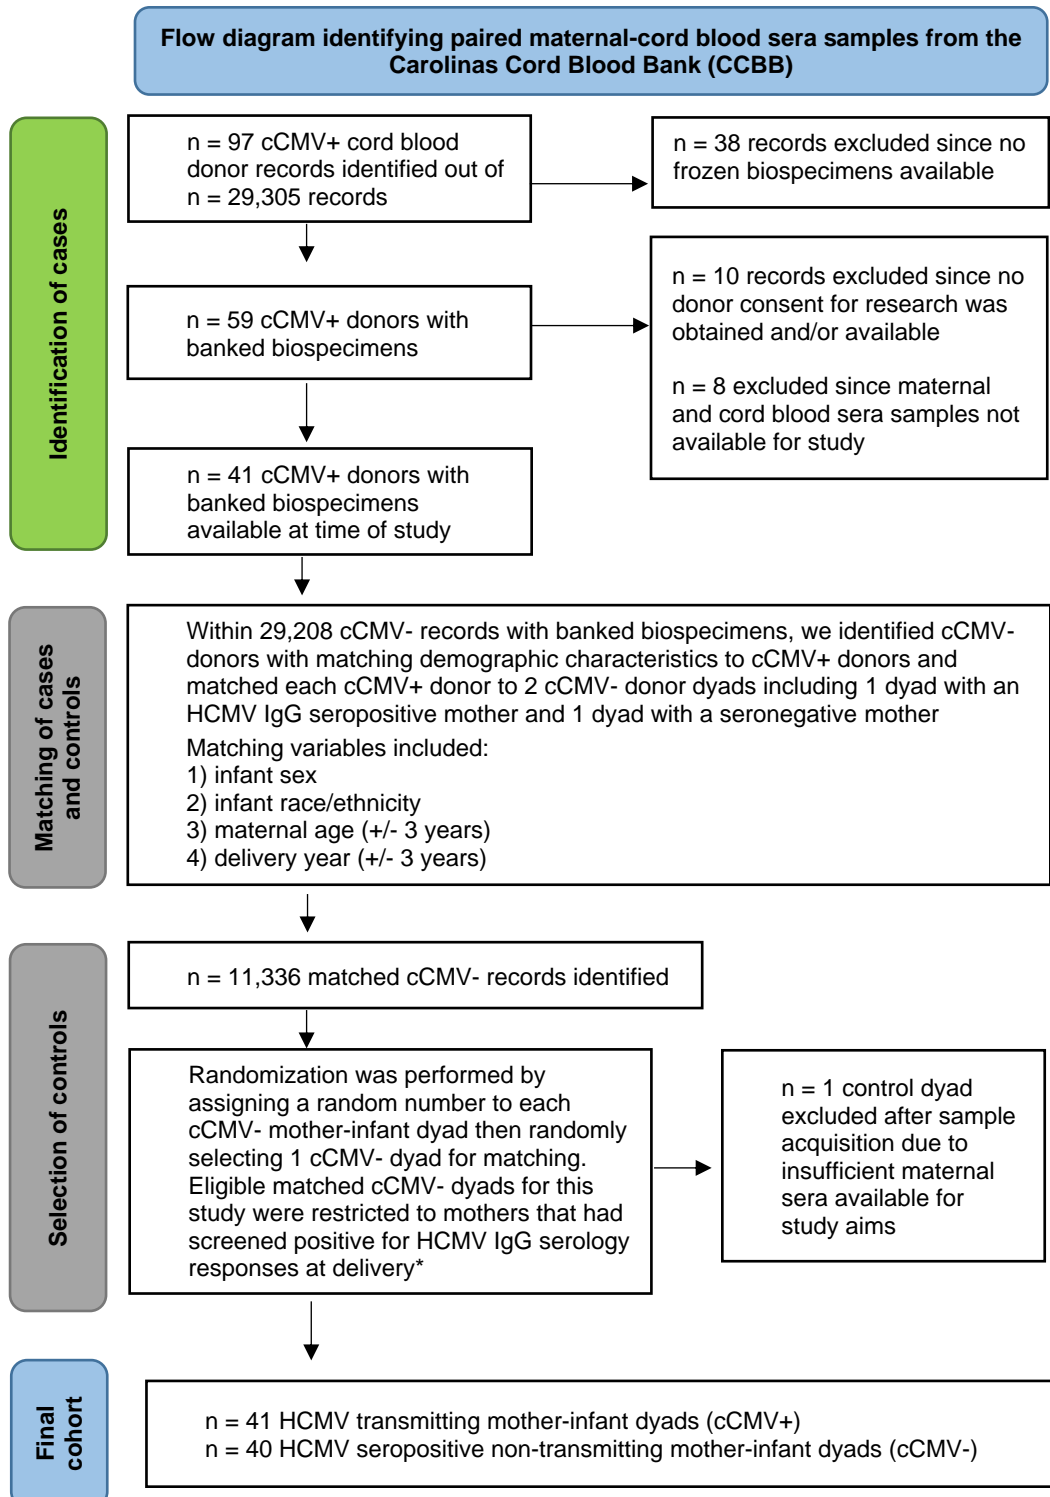

cCMV = congenital HCMV infection

cCMV+ = positive HCMV PCR cord blood screening at birth

cCMV- = negative HCMV PCR cord blood screening at birth

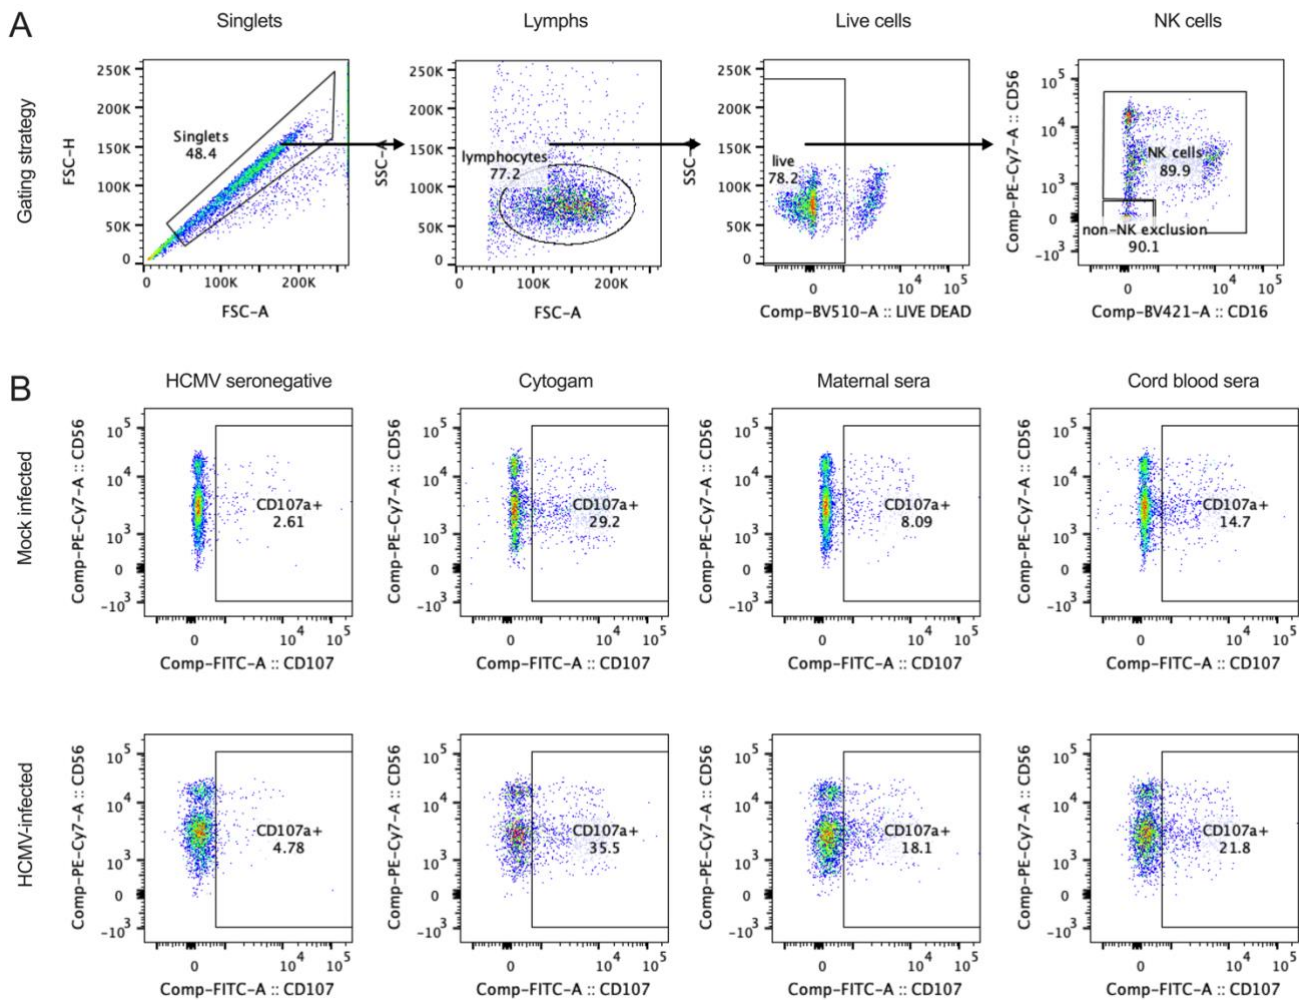

**Supplementary Figure 2. NK cell degranulation gating strategy for ADCC assay.** Antibody-dependent cellular cytotoxicity (ADCC) was measured by quantifying NK cell degranulation (i.e., CD107a positivity) against HCMV-infected fibroblasts. PBMCs were rested overnight then primary NK cells were isolated by negative selection with magnetic beads prior to co-incubation with HCMV-infected and mock-infected cells. (A) Gating strategy: singlets → lymphocytes → live lymphocytes → NK cells → CD107a positive cells. (B) CD107a positive cells were identified in the NK cell gate under mock-infected and HCMV-infected (MOI = 1) conditions for HCMV seronegative, Cytogam, and HCMV seropositive maternal and cord blood sera samples. HCMV-specific ADCC activating antibody responses were calculated by subtracting the % CD107a positive cells in the mock-infected condition from the % CD107a positive cells in the HCMV-infected condition for each sample.

**Supplementary Table 1. Maternal sera HCMV-specific antibody responses in HCMV transmitting versus non-transmitting dyads**

| Variable                        | HCMV transmitting (n = 41) |         | HCMV non-transmitting (n = 40) |         | p value          | FDR p value      |
|---------------------------------|----------------------------|---------|--------------------------------|---------|------------------|------------------|
|                                 | Median                     | IQR     | Median                         | IQR     |                  |                  |
| HCMV ADCC                       | 7.5                        | 5.7     | 9.6                            | 6.0     | <b>0.012</b>     | <b>0.020</b>     |
| HCMV IgG FcγRIII activation     | 9481.4                     | 7494.3  | 12864.4                        | 13557.8 | 0.054            | 0.076            |
| UL16 IgG binding level          | 32.3                       | 92.6    | 99.8                           | 342.8   | <b>0.019</b>     | <b>0.029</b>     |
| UL16 IgG FcγRIII V158           | 13.5                       | 53.5    | 420.6                          | 1028.1  | <b>&lt;0.001</b> | <b>&lt;0.001</b> |
| UL16 IgG FcγRIII F158           | 1.0                        | 0.0     | 119.4                          | 391.2   | <b>&lt;0.001</b> | <b>&lt;0.001</b> |
| UL16 IgG FcγRIII activation     | 0.3                        | 2.8     | 5.2                            | 61.3    | <b>0.002</b>     | <b>0.005</b>     |
| UL141 IgG binding level         | 465.0                      | 460.0   | 341.9                          | 351.7   | <b>0.010</b>     | <b>0.017</b>     |
| UL141 IgG FcγRIII V158          | 833.0                      | 480.3   | 736.7                          | 770.4   | 0.360            | 0.440            |
| UL141 IgG FcγRIII F158          | 431.5                      | 439.5   | 484.9                          | 411.1   | 0.640            | 0.690            |
| gB-transfected cell IgG binding | 24.4                       | 2.7     | 21.1                           | 7.1     | <b>0.005</b>     | <b>0.009</b>     |
| gB IgG binding level            | 6917.5                     | 9747.1  | 1591.3                         | 3126.6  | <b>&lt;0.001</b> | <b>0.001</b>     |
| gB IgG FcγRIII V158             | 798.5                      | 2605.7  | 418.3                          | 709.8   | <b>0.049</b>     | 0.070            |
| gB IgG FcγRIII F158             | 181.5                      | 1237.2  | 150.4                          | 253.8   | 0.290            | 0.370            |
| pentamer IgG binding level      | 7788.8                     | 12098.0 | 1471.8                         | 2600.2  | <b>&lt;0.001</b> | <b>&lt;0.001</b> |
| pentamer FcγRIII V158           | 3506.5                     | 5463.3  | 854.6                          | 1138.3  | <b>&lt;0.001</b> | <b>&lt;0.001</b> |
| pentamer IgG FcγRIII F158       | 1746.0                     | 4114.3  | 391.9                          | 450.5   | <b>&lt;0.001</b> | <b>&lt;0.001</b> |
| gHgLgO IgG binding level        | 9468.0                     | 14464.4 | 1666.9                         | 3341.4  | <b>&lt;0.001</b> | <b>&lt;0.001</b> |
| gHgLgO FcγRIII V158             | 3235.3                     | 7297.0  | 630.3                          | 976.7   | <b>&lt;0.001</b> | <b>&lt;0.001</b> |
| gHgLgO IgG FcγRIII F158         | 1598.0                     | 4973.8  | 270.7                          | 612.2   | <b>&lt;0.001</b> | <b>&lt;0.001</b> |
| gHgL IgG binding level          | 704.8                      | 893.2   | 213.2                          | 296.2   | <b>&lt;0.001</b> | <b>&lt;0.001</b> |
| gHgL FcγRIII V158               | 102.0                      | 270.5   | 51.4                           | 64.2    | <b>0.009</b>     | <b>0.016</b>     |
| gHgL IgG FcγRIII F158           | 22.0                       | 106.0   | 10.9                           | 19.5    | 0.094            | 0.130            |
| pp52 IgG binding level          | 6774.3                     | 9980.0  | 1077.5                         | 2805.6  | <b>&lt;0.001</b> | <b>&lt;0.001</b> |
| pp52 FcγRIII V158               | 6120.0                     | 10500.3 | 1982.3                         | 4796.3  | <b>0.003</b>     | <b>0.006</b>     |
| pp52 IgG FcγRIII F158           | 3839.3                     | 8998.2  | 1351.2                         | 2793.8  | <b>0.011</b>     | <b>0.018</b>     |
| pp28 IgG binding level          | 2606.8                     | 5139.5  | 1689.3                         | 3689.4  | 0.071            | 0.097            |
| pp28 FcγRIII V158               | 2503.5                     | 4755.5  | 2454.5                         | 3950.9  | 0.980            | 0.980            |
| pp28 IgG FcγRIII F158           | 557.5                      | 3223.8  | 934.2                          | 2410.5  | 0.390            | 0.460            |
| pp150 IgG binding level         | 16009.3                    | 17044.8 | 7059.9                         | 14579.7 | <b>0.006</b>     | <b>0.011</b>     |
| pp150 FcγRIII V158              | 10488.3                    | 10381.3 | 8811.8                         | 8544.8  | 0.360            | 0.440            |
| pp150 IgG FcγRIII F158          | 9012.8                     | 14228.7 | 7410.2                         | 9211.9  | 0.500            | 0.560            |

Bold indicates statistical significance (p < 0.05).

**Supplementary Table 2. Cord blood sera HCMV-specific antibody responses in HCMV transmitting versus non-transmitting dyads**

| Variable                        | HCMV transmitting (n = 41) |         | HCMV non-transmitting (n = 40) |         | p value          | FDR p value      |
|---------------------------------|----------------------------|---------|--------------------------------|---------|------------------|------------------|
|                                 | Median                     | IQR     | Median                         | IQR     |                  |                  |
| HCMV ADCC                       | 4.8                        | 3.8     | 7.1                            | 4.0     | <b>0.001</b>     | <b>0.003</b>     |
| HCMV IgG FcγRIII activation     | 8790.8                     | 7983.3  | 12847.7                        | 14424.3 | <b>0.008</b>     | <b>0.015</b>     |
| UL16 IgG binding level          | 19.0                       | 54.4    | 125.4                          | 278.5   | <b>0.002</b>     | <b>0.004</b>     |
| UL16 IgG FcγRIII V158           | 11.0                       | 37.3    | 284.3                          | 754.9   | <b>&lt;0.001</b> | <b>&lt;0.001</b> |
| UL16 IgG FcγRIII F158           | 1.0                        | 4.3     | 70.8                           | 265.2   | <b>&lt;0.001</b> | <b>&lt;0.001</b> |
| UL16 IgG FcγRIII activation     | 0.3                        | 6.5     | 1.4                            | 21.0    | 0.400            | 0.470            |
| UL141 IgG binding level         | 385.5                      | 361.2   | 302.0                          | 352.9   | <b>0.035</b>     | 0.051            |
| UL141 IgG FcγRIII V158          | 783.5                      | 644.5   | 677.3                          | 771.5   | 0.420            | 0.490            |
| UL141 IgG FcγRIII F158          | 476.3                      | 354.0   | 496.3                          | 446.6   | 0.970            | 0.980            |
| gB-transfected cell IgG binding | 24.0                       | 2.1     | 21.8                           | 6.7     | <b>0.002</b>     | <b>0.003</b>     |
| gB IgG binding level            | 4733.0                     | 7638.2  | 1824.2                         | 1945.2  | <b>&lt;0.001</b> | <b>0.001</b>     |
| gB IgG FcγRIII V158             | 750.8                      | 1714.5  | 305.1                          | 441.3   | <b>0.016</b>     | <b>0.026</b>     |
| gB IgG FcγRIII F158             | 163.8                      | 446.7   | 95.9                           | 156.6   | 0.200            | 0.260            |
| pentamer IgG binding level      | 10772.1                    | 16600.4 | 952.1                          | 1904.4  | <b>&lt;0.001</b> | <b>&lt;0.001</b> |
| pentamer FcγRIII V158           | 6350.3                     | 7475.2  | 606.6                          | 751.5   | <b>&lt;0.001</b> | <b>&lt;0.001</b> |
| pentamer IgG FcγRIII F158       | 3059.0                     | 5823.8  | 281.7                          | 335.8   | <b>&lt;0.001</b> | <b>&lt;0.001</b> |
| gHgLgO IgG binding level        | 10785.4                    | 18236.0 | 973.3                          | 2280.3  | <b>&lt;0.001</b> | <b>&lt;0.001</b> |
| gHgLgO FcγRIII V158             | 6267.8                     | 10928.2 | 424.9                          | 741.7   | <b>&lt;0.001</b> | <b>&lt;0.001</b> |
| gHgLgO IgG FcγRIII F158         | 3482.8                     | 6573.0  | 138.0                          | 218.3   | <b>&lt;0.001</b> | <b>&lt;0.001</b> |
| gHgL IgG binding level          | 772.3                      | 1562.0  | 123.6                          | 225.3   | <b>&lt;0.001</b> | <b>&lt;0.001</b> |
| gHgL FcγRIII V158               | 122.3                      | 313.2   | 37.2                           | 49.5    | <b>0.001</b>     | <b>0.002</b>     |
| gHgL IgG FcγRIII F158           | 20.0                       | 91.8    | 8.7                            | 12.9    | <b>0.017</b>     | <b>0.027</b>     |
| pp52 IgG binding level          | 6894.0                     | 7742.3  | 634.3                          | 2465.6  | <b>&lt;0.001</b> | <b>&lt;0.001</b> |
| pp52 FcγRIII V158               | 6641.0                     | 7955.7  | 1486.8                         | 4117.8  | <b>&lt;0.001</b> | <b>&lt;0.001</b> |
| pp52 IgG FcγRIII F158           | 3809.0                     | 8143.0  | 922.7                          | 2610.6  | <b>0.001</b>     | <b>0.002</b>     |
| pp28 IgG binding level          | 1459.0                     | 1972.8  | 1383.7                         | 2528.4  | 0.310            | 0.390            |
| pp28 FcγRIII V158               | 1226.5                     | 2212.0  | 1623.0                         | 3973.5  | 0.880            | 0.910            |
| pp28 IgG FcγRIII F158           | 275.0                      | 989.2   | 697.9                          | 2428.9  | 0.370            | 0.440            |
| pp150 IgG binding level         | 20199.0                    | 14946.0 | 6307.0                         | 15201.4 | <b>0.001</b>     | <b>0.003</b>     |
| pp150 FcγRIII V158              | 13487.3                    | 8827.5  | 7418.3                         | 11574.3 | <b>0.020</b>     | <b>0.030</b>     |
| pp150 IgG FcγRIII F158          | 11753.8                    | 12327.8 | 5710.8                         | 10773.8 | <b>0.029</b>     | <b>0.042</b>     |

Bold indicates statistical significance (p < 0.05).

| Supplementary Table 3. Maternal sera antibody responses in dyads with low/intermediate versus high HCMV IgG avidity scores <sup>a</sup> |                                    |         |                         |         |                  |              |
|-----------------------------------------------------------------------------------------------------------------------------------------|------------------------------------|---------|-------------------------|---------|------------------|--------------|
| Variable                                                                                                                                | Low/intermediate RAI score (n = 9) |         | High RAI score (n = 72) |         | p value          | FDR p value  |
|                                                                                                                                         | Median                             | IQR     | Median                  | IQR     |                  |              |
| HCMV ADCC                                                                                                                               | 5.1                                | 2.6     | 9.5                     | 5.8     | <b>0.001</b>     | <b>0.004</b> |
| HCMV IgG FcγRIII activation                                                                                                             | 7041.7                             | 1067.1  | 12517.9                 | 11502.6 | <b>&lt;0.001</b> | <b>0.002</b> |
| UL16 IgG binding level                                                                                                                  | 20.2                               | 13.2    | 90.9                    | 259.2   | <b>0.002</b>     | <b>0.008</b> |
| UL16 IgG FcγRIII V158                                                                                                                   | 1.9                                | 9.2     | 90.3                    | 949.4   | <b>&lt;0.001</b> | <b>0.001</b> |
| UL16 IgG FcγRIII F158                                                                                                                   | 1.0                                | 0.0     | 11.8                    | 389.1   | <b>0.003</b>     | <b>0.011</b> |
| UL16 IgG FcγRIII activation                                                                                                             | 0.3                                | 0.0     | 2.6                     | 35.2    | <b>0.022</b>     | <b>0.041</b> |
| UL141 IgG binding level                                                                                                                 | 296.5                              | 239.3   | 419.5                   | 330.1   | 0.130            | 0.170        |
| UL141 IgG FcγRIII V158                                                                                                                  | 507.0                              | 498.5   | 850.8                   | 772.9   | <b>0.004</b>     | <b>0.012</b> |
| UL141 IgG FcγRIII F158                                                                                                                  | 189.3                              | 186.9   | 488.3                   | 471.5   | <b>&lt;0.001</b> | <b>0.001</b> |
| gB-transfected cell IgG binding                                                                                                         | 23.0                               | 4.5     | 23.8                    | 4.8     | 0.550            | 0.600        |
| gB IgG binding level                                                                                                                    | 2740.6                             | 3899.8  | 3637.0                  | 7335.6  | 0.470            | 0.530        |
| gB IgG FcγRIII V158                                                                                                                     | 292.4                              | 419.9   | 651.0                   | 1625.3  | 0.100            | 0.140        |
| gB IgG FcγRIII F158                                                                                                                     | 42.7                               | 137.1   | 191.8                   | 636.5   | <b>0.041</b>     | 0.065        |
| pentamer IgG binding level                                                                                                              | 5601.5                             | 8726.1  | 3709.0                  | 7396.3  | 0.550            | 0.600        |
| pentamer FcγRIII V158                                                                                                                   | 1999.8                             | 2860.0  | 1896.0                  | 3028.6  | 0.840            | 0.870        |
| pentamer IgG FcγRIII F158                                                                                                               | 762.3                              | 1864.7  | 651.8                   | 1922.8  | 0.790            | 0.830        |
| gHgLgO IgG binding level                                                                                                                | 4950.7                             | 10157.5 | 4640.0                  | 8556.6  | 0.960            | 0.960        |
| gHgLgO FcγRIII V158                                                                                                                     | 1369.5                             | 3219.3  | 1750.0                  | 3651.3  | 0.900            | 0.920        |
| gHgLgO IgG FcγRIII F158                                                                                                                 | 313.7                              | 1349.5  | 716.0                   | 2401.6  | 0.570            | 0.610        |
| gHgL IgG binding level                                                                                                                  | 249.2                              | 330.3   | 447.5                   | 689.6   | 0.200            | 0.250        |
| gHgL FcγRIII V158                                                                                                                       | 33.9                               | 109.5   | 68.8                    | 110.6   | 0.140            | 0.180        |
| gHgL IgG FcγRIII F158                                                                                                                   | 2.8                                | 22.6    | 14.8                    | 42.8    | 0.070            | 0.100        |
| pp52 IgG binding level                                                                                                                  | 10843.7                            | 13307.5 | 2494.5                  | 5583.1  | <b>0.010</b>     | <b>0.022</b> |
| pp52 FcγRIII V158                                                                                                                       | 6891.3                             | 12057.0 | 3681.0                  | 6418.1  | 0.140            | 0.180        |
| pp52 IgG FcγRIII F158                                                                                                                   | 4038.3                             | 8863.0  | 1874.8                  | 4564.4  | 0.240            | 0.300        |
| pp28 IgG binding level                                                                                                                  | 1787.3                             | 1468.2  | 2465.3                  | 4081.5  | 0.280            | 0.340        |
| pp28 FcγRIII V158                                                                                                                       | 1079.7                             | 1475.8  | 2537.3                  | 5050.5  | <b>0.028</b>     | <b>0.049</b> |
| pp28 IgG FcγRIII F158                                                                                                                   | 220.3                              | 349.1   | 888.3                   | 3529.0  | <b>0.008</b>     | <b>0.019</b> |
| pp150 IgG binding level                                                                                                                 | 11497.6                            | 17510.0 | 10391.3                 | 18133.3 | 0.950            | 0.960        |
| pp150 FcγRIII V158                                                                                                                      | 4789.9                             | 8643.3  | 9824.5                  | 9385.9  | 0.097            | 0.140        |
| pp150 IgG FcγRIII F158                                                                                                                  | 4026.3                             | 6731.6  | 8581.0                  | 12943.8 | 0.061            | 0.092        |

<sup>a</sup> HCMV IgG relative avidity index (RAI) score was calculated as the mean RAI measured against 3 HCMV strains. RAI scores <60% were considered low/intermediate avidity whereas scores ≥60% were considered high avidity. Bold indicates statistical significance (p < 0.05).

| Supplementary Table 4. Maternal sera antibody responses in dyads with and without detectable HCMV-specific IgM <sup>a</sup> |                          |         |                          |         |              |              |
|-----------------------------------------------------------------------------------------------------------------------------|--------------------------|---------|--------------------------|---------|--------------|--------------|
| Variable                                                                                                                    | HCMV IgM+ mothers (n=13) |         | HCMV IgM- mothers (n=68) |         | p value      | FDR p value  |
|                                                                                                                             | Median                   | IQR     | Median                   | IQR     |              |              |
| HCMV ADCC                                                                                                                   | 6.8                      | 8.0     | 9.1                      | 5.7     | 0.130        | 0.240        |
| HCMV IgG FcγRIII activation                                                                                                 | 7717.6                   | 5689.2  | 12136.6                  | 11592.6 | <b>0.044</b> | 0.120        |
| UL16 IgG binding level                                                                                                      | 29.5                     | 27.3    | 89.9                     | 256.7   | <b>0.026</b> | 0.090        |
| UL16 IgG FcγRIII V158                                                                                                       | 9.0                      | 18.3    | 93.6                     | 884.3   | <b>0.001</b> | <b>0.017</b> |
| UL16 IgG FcγRIII F158                                                                                                       | 1.0                      | 0.0     | 12.9                     | 388.4   | <b>0.002</b> | <b>0.022</b> |
| UL16 IgG FcγRIII activation                                                                                                 | 0.3                      | 0.0     | 2.0                      | 31.6    | 0.076        | 0.180        |
| UL141 IgG binding level                                                                                                     | 376.3                    | 355.7   | 417.2                    | 339.7   | 0.860        | 0.920        |
| UL141 IgG FcγRIII V158                                                                                                      | 669.3                    | 506.5   | 838.2                    | 780.6   | 0.084        | 0.180        |
| UL141 IgG FcγRIII F158                                                                                                      | 296.8                    | 286.5   | 484.9                    | 498.4   | <b>0.025</b> | 0.090        |
| gB-transfected cell IgG binding                                                                                             | 22.9                     | 4.7     | 23.8                     | 4.8     | 0.900        | 0.960        |
| gB IgG binding level                                                                                                        | 4245.5                   | 11222.5 | 2762.0                   | 5690.9  | 0.620        | 0.750        |
| gB IgG FcγRIII V158                                                                                                         | 1262.0                   | 1862.0  | 477.4                    | 1047.3  | 0.460        | 0.610        |
| gB IgG FcγRIII F158                                                                                                         | 445.0                    | 692.7   | 158.1                    | 364.7   | 0.590        | 0.730        |
| pentamer IgG binding level                                                                                                  | 7703.5                   | 15607.6 | 3711.1                   | 6498.0  | 0.084        | 0.180        |
| pentamer FcγRIII V158                                                                                                       | 3203.5                   | 5246.5  | 1572.8                   | 2766.1  | 0.073        | 0.180        |
| pentamer IgG FcγRIII F158                                                                                                   | 2225.5                   | 4176.2  | 611.8                    | 1502.8  | 0.130        | 0.240        |
| gHgLgO IgG binding level                                                                                                    | 9859.8                   | 15935.0 | 4208.0                   | 7848.2  | 0.077        | 0.180        |
| gHgLgO FcγRIII V158                                                                                                         | 4511.0                   | 5208.2  | 1235.8                   | 2634.4  | 0.061        | 0.160        |
| gHgLgO IgG FcγRIII F158                                                                                                     | 2445.5                   | 4781.0  | 433.7                    | 1354.2  | 0.091        | 0.190        |
| gHgL IgG binding level                                                                                                      | 509.5                    | 580.0   | 410.9                    | 664.8   | 0.750        | 0.830        |
| gHgL FcγRIII V158                                                                                                           | 63.8                     | 266.5   | 69.2                     | 98.2    | 0.550        | 0.700        |
| gHgL IgG FcγRIII F158                                                                                                       | 7.0                      | 63.3    | 15.1                     | 32.5    | 0.340        | 0.470        |
| pp52 IgG binding level                                                                                                      | 11638.8                  | 14187.0 | 2429.8                   | 5181.9  | <b>0.003</b> | <b>0.023</b> |
| pp52 FcγRIII V158                                                                                                           | 7662.5                   | 9836.8  | 3031.6                   | 5465.0  | <b>0.014</b> | 0.063        |
| pp52 IgG FcγRIII F158                                                                                                       | 4913.3                   | 8810.5  | 1491.6                   | 4591.1  | <b>0.022</b> | 0.085        |
| pp28 IgG binding level                                                                                                      | 2606.8                   | 5061.5  | 2209.0                   | 3962.8  | 0.290        | 0.420        |
| pp28 FcγRIII V158                                                                                                           | 1690.3                   | 4247.3  | 2466.7                   | 4595.6  | 0.990        | 0.990        |
| pp28 IgG FcγRIII F158                                                                                                       | 555.3                    | 2684.5  | 854.9                    | 3196.8  | 0.650        | 0.780        |
| pp150 IgG binding level                                                                                                     | 23035.8                  | 11150.5 | 9472.6                   | 17520.5 | <b>0.016</b> | 0.069        |
| pp150 FcγRIII V158                                                                                                          | 14658.5                  | 10975.8 | 9216.9                   | 9331.6  | 0.190        | 0.310        |
| pp150 IgG FcγRIII F158                                                                                                      | 14402.5                  | 14151.7 | 7566.6                   | 9674.8  | 0.240        | 0.360        |

Bold indicates statistical significance (p < 0.05).

**Supplementary Table 5. Univariate logistic regression analysis of antibody responses and risk of cCMV infection excluding HCMV IgG low/intermediate avidity mothers**

| Antibody variable            | Maternal sera   |             |              | Cord blood sera |             |              |
|------------------------------|-----------------|-------------|--------------|-----------------|-------------|--------------|
|                              | OR <sup>a</sup> | 95% CI      | p value      | OR              | 95% CI      | p value      |
| HCMV ADCC                    | 0.89            | 0.78 - 1.01 | 0.065        | 0.81            | 0.68 - 0.96 | <b>0.017</b> |
| HCMV IgG FcγRIII activation  | 1.09            | 0.73 - 1.65 | 0.658        | 1.09            | 0.76 - 1.59 | 0.632        |
| UL16 IgG binding level level | 0.87            | 0.65 - 1.16 | 0.341        | 0.83            | 0.62 - 1.12 | 0.228        |
| UL16 IgG FcγRIII V158        | 0.76            | 0.61 - 0.94 | <b>0.010</b> | 0.70            | 0.56 - 0.88 | <b>0.003</b> |
| UL16 IgG FcγRIII F158        | 0.79            | 0.67 - 0.94 | <b>0.006</b> | 0.75            | 0.62 - 0.90 | <b>0.003</b> |
| UL16 IgG FcγRIII activation  | 0.85            | 0.73 - 1.00 | <b>0.045</b> | 1.00            | 0.87 - 1.15 | 0.993        |

<sup>a</sup> OR < 1.0 is associated with decreased risk and OR > 1.0 is associated with increased risk of congenital HCMV transmission. Bold indicates statistical significance (p < 0.05). n = 72 mother-infant dyads

**Supplementary Table 6. Univariate logistic regression analysis of antibody responses and risk of cCMV infection excluding HCMV-specific IgM+ mothers**

| Antibody variable            | Maternal sera   |             |              | Cord blood sera |             |              |
|------------------------------|-----------------|-------------|--------------|-----------------|-------------|--------------|
|                              | OR <sup>a</sup> | 95% CI      | p value      | OR              | 95% CI      | p value      |
| HCMV ADCC                    | 0.89            | 0.78 - 1.01 | 0.081        | 0.86            | 0.73 - 1.01 | 0.070        |
| HCMV IgG FcγRIII activation  | 1.07            | 0.71 - 1.07 | 0.755        | 1.08            | 0.75 - 1.57 | 0.672        |
| UL16 IgG binding level level | 0.92            | 0.68 - 1.23 | 0.572        | 0.87            | 0.64 - 1.18 | 0.386        |
| UL16 IgG FcγRIII V158        | 0.78            | 0.63 - 0.96 | <b>0.017</b> | 0.72            | 0.58 - 0.90 | <b>0.005</b> |
| UL16 IgG FcγRIII F158        | 0.80            | 0.68 - 0.95 | <b>0.013</b> | 0.76            | 0.63 - 0.92 | <b>0.005</b> |
| UL16 IgG FcγRIII activation  | 0.86            | 0.73 - 1.01 | 0.068        | 1.01            | 0.87 - 1.17 | 0.895        |

<sup>a</sup> OR < 1.0 is associated with decreased risk and OR > 1.0 is associated with increased risk of congenital HCMV transmission. Bold indicates statistical significance (p < 0.05). n = 68 mother-infant dyads

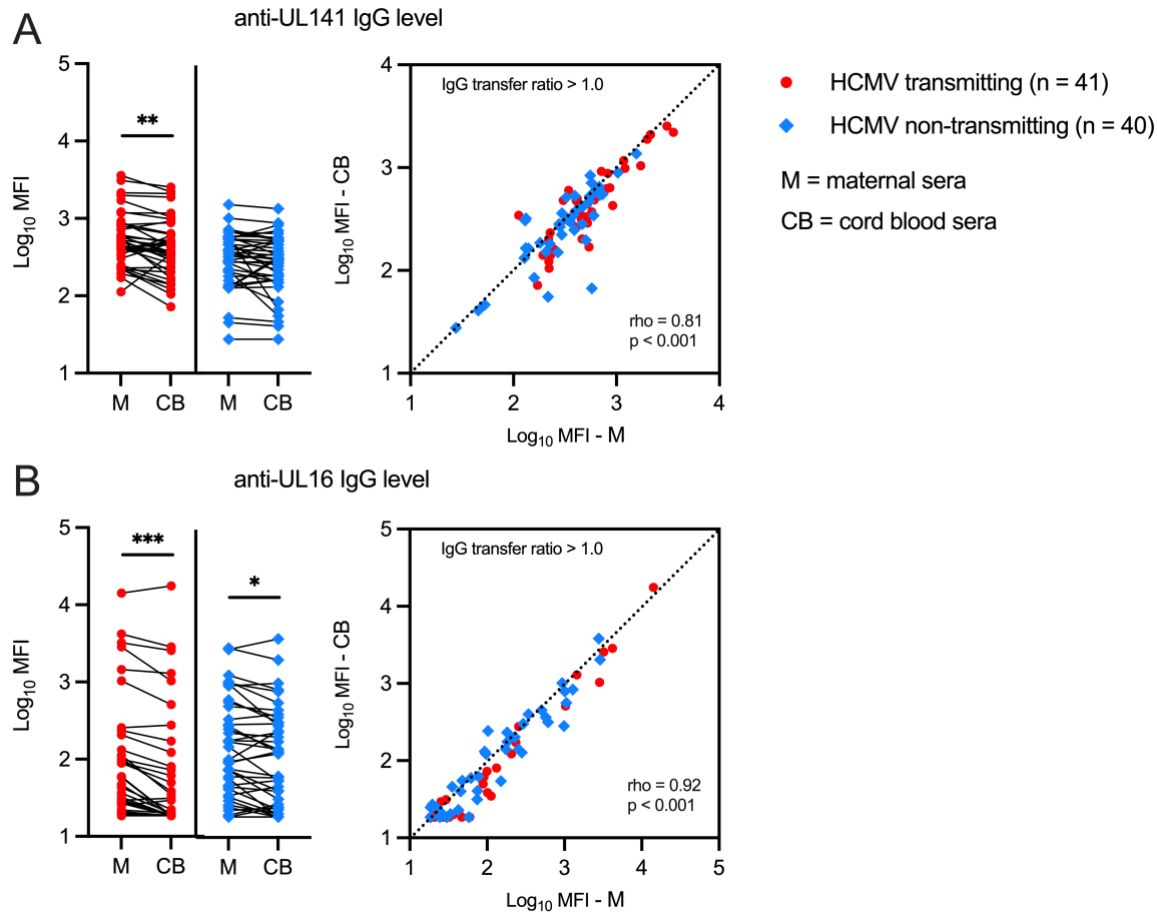

**Supplementary Figure 3. Anti-UL141 and anti-UL16 IgG transfer from maternal to cord blood sera.** Anti-UL141 and anti-UL16 IgG binding levels were measured with a binding level antibody multiplex assay using maternal (M) and cord blood (CB) sera from HCMV transmitting (red circles, n = 41) and non-transmitting (blue diamonds, n = 40) mother-infant dyads. (A) Anti-UL141 IgG level compared within mother-infant dyads and scatterplot showing Spearman correlation between anti-UL141 IgG level in paired maternal versus cord blood sera samples. (B) Anti-UL16 IgG level compared within mother-infant dyads and scatterplot showing Spearman correlation between anti-UL141 IgG level in paired maternal versus cord blood sera samples. FDR-corrected *P* values for Wilcoxon signed-rank test. \* *P* < 0.05, \*\**P* < 0.01, \*\*\**P* < 0.001.
